# Supplementary material for: spaCR: Spatial phenotype analysis of CRISPR-Cas9 screens
Source: Research Square preprint supplement (doi:10.21203/rs.3.rs-7368254/v1), 2025-08-19
Supplement: Supplementary file 1 [file d37a6e45bcc8dc4e1b70a36b.docx]

Protocol: Spatial Phenotype CRISPR-Cas9 Screen with *Toxoplasma gondii*

**gRNA Library Preparation and Transfection**

- From a concentrated glycerol stock of the pU6-DHFR Hi-Lib plasmid library, streak 3x106 bacteria onto large square LB-agar plates containing ampicillin (50 µg/mL) (~10 plates). Incubate at 37°C overnight to form bacterial colonies.

- Flood plates with 10-15 mL LB broth, scrape colonies from agar, freeze at least 1 mL of solution, then proceed with plasmid extraction with 2-3g of bacterial pellet using a Qiagen MaxiPrep Kit (Cat#: 12162). Ensure >500 µg total yield. Validate library diversity by NGS.

***MaxiPrep Protocol***

- Pellet bacteria by centrifugation at 6000 × g for 15 min at 4°C.
- Resuspend the pellet in 10 mL Buffer P1.
- Lyse with 10 mL Buffer P2, invert gently and incubate 5 min at room temperature.
- Neutralize with 10 mL chilled Buffer P3. Mix and incubate on ice for 15 min.
- Centrifuge at 20,000 × g for 30 min at 4°C.
- Filter the supernatant and apply to a pre-equilibrated Qiagen-tip 500 column.
- Wash with 2×30 mL Buffer QC.
- Elute DNA with 15 mL Buffer QF.
- Precipitate DNA by adding 10.5 mL isopropanol. Mix and incubate at room temperature for 10 min.
- Centrifuge at 15,000 × g for 30 min at 4°C.
- Wash pellet with 5 mL 70% ethanol, air dry, and resuspend in TE buffer.
- If DNA concentration is less than 1 µg/µL proceed with isopropanol extraction. Precipitate with isopropanol (0.1 vol 3M sodium acetate pH 5.2, 2.5 vol cold isopropanol, -20°C overnight), centrifuge at 13,000 × g for 30 min, wash with 70% ethanol, air dry, and resuspend.
- Linearize 50 µg pU6-DHFR Hi-Lib plasmid DNA using AseI (New England Biolabs, Cat#: R0526S).
- Dialyze purified DNA dropwise against water using a 0.025 µm membrane (Millipore VSWP02500) for 1 hour at room temperature.
- Maintain RHCas9DsRed tachyzoites in human foreskin fibroblasts (HFF) cultured in Dulbecco’s modified Eagle’s medium (DMEM) supplemented with 10% FBS, 20 mM HEPES, 5 µg/mL penicillin/streptomycin, and 2 mM L-glutamine (D10), incubated at 37°C and 5% CO₂.
- Harvest parasites by scraping, syringe-lysing, and filtering through a 5 µm filter. Centrifuge parasites at 1000 × g for 10 min and resuspend 5×10⁷ tachyzoites in 400 µL electroporation buffer (0.15 mM CaCl₂, 2 mM ATP, 5 mM glutathione in cytomix) containing 50 µg linearized Hi-Lib DNA.
- Electroporate parasites with a single pulse of 1700 V for 150 µs.
- Immediately transfer parasites to a confluent HFF monolayer in a T75 flask.
- After 24 h, replace the culture medium with selection media (D10 supplemented with 3 µM pyrimethamine, 40 µM chloramphenicol, and 10 µg/mL DNase I).
- Passage parasites three times under selection conditions, without DNase I, (6×10⁶, then 3×10⁶, then 3×10⁶ parasites). Maintain a library coverage of at least ≥ 300x for each passage.

**NOTE:** Expand the library using plates not liquid culture to minimize competition and maintain library diversity.

**Seeder Plates**

- Seed HFF cells into four 384-well plates, ensuring 100% confluency at the time of parasite seeding.
- Add transfected parasites at approximately 10 parasites per well to achieve ~5 plaques per well after growth.
- Allow parasites to replicate for 5 days or until plaques cover approximately 50% of each well.
- Carefully transfer 10 µL from each well into corresponding wells of sequencing plates (Bio-Rad, Cat#: HSP3805) and imaging plates (Revity, Cat#: 6057302). Immediately seal and store sequencing plates at -80°C.

**NOTE:** Reserve columns 1 and 2 for positive and negative controls, respectively.

**Sequencing Plates**

- Perform direct PCR using the Phire kit (Thermo Fisher, Cat#: F-170L). First, add 10 µL dilution buffer with DNA release agent (DB+) to each well.
- Seal PCR plates, spin at 1000 g, and incubate at 98°C for 2 min in a thermal cycler to lyse cells and release genomic DNA. Immediately cool plates on ice.
- In new PCR plates, prepare reactions by adding 5 µL 2x PCR master mix, 1.5 µL forward primer (with unique row barcode), 1.5 µL reverse primer (with unique column barcode), and 2 µL DNA template from the corresponding well lysate.
- Seal plates and amplify for 40 cycles (98°C for 10 s, 60°C for 30 s, 72°C for 30 s).
- Pool PCR products, concentrate via phenol/chloroform extraction, and perform gel purification.

***Phenol/Chloroform Extraction***

- Add an equal volume of phenol:chloroform:isoamyl alcohol (25:24:1) to the PCR product.
- Vortex briefly and centrifuge at 13,000 × g for 10 min at room temperature.
- Carefully transfer the aqueous (upper) phase to a new tube without disturbing the interface.

***Gel purification***

- Excise DNA fragment from agarose gel under UV illumination.
- Weigh gel slice and add 3 volumes Buffer QG (100 mg gel ~ 100 µL).
- Incubate at 50°C until completely dissolved (approximately 10 min).
- Add 1 volume of isopropanol and mix thoroughly.
- Apply sample to QIAquick spin column and centrifuge at 13,000 × g for 1 min.
- Wash column with 750 µL Buffer PE and centrifuge at 13,000 × g for 1 min.
- Centrifuge again at 13,000 × g for 1 min to remove residual buffer.
- Elute DNA in 30-50 µL Buffer EB or water.
- Sequence purified amplicons on an Illumina NovaSeq 6000 (GeneWiz), allocating one flow cell per 384-well plate, or include plate barcodes in PCR amplicons.
- Map sequencing reads to individual wells and gRNAs using the spaCR GUI barcode mapping module (spacr.sequencing.generate_barecode_mapping) or [Jupyter notebook](https://github.com/EinarOlafsson/spacr/blob/main/Notebooks/4_spacr_map_barecodes.ipynb).

**Imaging Plates**

- Seed poly-D-lysine-coated 384-well imaging plates (Revity, Cat#: 6057302) with HeLaGFP-TSG101 cells at 4000 cells/well. Allow cells to adhere and incubate at 37°C and 5% CO₂ for 4 h.
- Transfer parasites from the corresponding wells of the seeder plates to imaging plates. Ensure the inclusion of negative (Δ*sag1*) and positive (Δ*gra14*) controls.
- After 24 h incubation, fix cells with 4% paraformaldehyde for 15 min at room temperature and block for 10 min with PBS + 5 % FBS.
- Stain nuclei with Hoechst and cells with CellMask Deep-Red in PBS containing 0.4% sodium azide. Store plates at 4°C protected from light until imaging.
- Capture images using a high-content spinning-disk confocal microscope (e.g., Yokogawa CellVoyager 8000) or fluorescence at 40x or 20x magnification. Generate maximum intensity projections (MIPs) across z-stack slices covering a depth of 10 µm.
- Segment nuclei, cells, and parasite-containing vacuoles using the spaCR GUI mask module (spacr.core.preprocess_generate_masks) or [Jupyter notebook](https://github.com/EinarOlafsson/spacr/blob/main/Notebooks/1_spacr_generate_masks.ipynb).
- Generate single-cell images and measurements using spaCR GUI measure module (spacr.measure.measure_crop) or [Jupyter notebook](https://github.com/EinarOlafsson/spacr/blob/main/Notebooks/2_spacr_generate_mesurments_crop_images.ipynb).

**NOTE:** This protocol can be adapted for CRISPR screens in host cells by replacing the parasite transfection step with lentiviral transduction and selection of pooled mutant populations, followed by the same imaging and sequencing protocol.

**Phenotypic Classification and Genotype Correlation**

- Using spaCR GUI classify module or [Jupyter notebook](http://3b_spacr_computer_vision.ipynb/), train a Torch-based deep learning model (e.g., MaxViT) on single-cell images from control wells.
- Using spaCR GUI machine learning module or [Jupyter notebook](https://github.com/EinarOlafsson/spacr/blob/main/Notebooks/3a_spacr_machine_learning.ipynb), train machine learning models (e.g., XGBoost) on cell-level features.
- Apply the trained model to classify phenotypes in single-cell images from experimental wells.
- Using spaCR GUI regression module (spacr.regression.perform_regression) or Jupyter notebook, perform multiple linear regression analysis to correlate phenotypic scores with genotype data.

**NOTE:** Ensure single-cell images used for Torch models are 224x224 pixels. Use GPUs with ≥24 GB VRAM for efficient model training and inference.

**Hit Validation**

- Streak Hi-Lib transformed bacteria onto LB ampicillin agar plates and isolate single colonies. Incubate plates overnight at 37°C.
- Select a single colony and grow overnight in LB broth with antibiotics.
- Isolate plasmid DNA using a plasmid purification kit (Qiagen MiniPrep, Cat#: 27106).

***MiniPrep Protocol:***

- Inoculate a 5 mL LB culture with a single ampicillin-resistant colony and incubate at 37°C overnight with shaking (200–250 rpm).
- Pellet 1.5 mL culture by centrifugation at 13,000 × g for 1 min. Discard supernatant.
- Resuspend pellet in 250 µL Buffer P1.
- Add 250 µL Buffer P2, mix by inversion. Incubate 5 min at room temperature.
- Add 350 µL Buffer N3, mix by inversion. Centrifuge at 13,000 × g for 10 min.
- Apply supernatant to a spin column. Centrifuge for 60 s and discard flow-through.
- Wash column with 500 µL Buffer PB. Centrifuge and discard flow-through.
- Wash with 750 µL Buffer PE. Centrifuge and discard flow-through.
- Centrifuge empty column for 1 min to remove residual ethanol.
- Elute DNA in 30–50 µL Buffer EB or nuclease-free water.
- Perform site-directed mutagenesis using Q5 Site-Directed Mutagenesis Kit (New England Biolabs, Cat#: E0554S) to introduce desired gRNA mutations.

***Q5 Site-Directed Mutagenesis:***

- Design primers introducing desired gRNA sequence into the pU6-DHFR backbone following NEBaseChanger tool recommendations.
- Set up PCR reaction with Q5 Hot Start High-Fidelity DNA Polymerase (NEB Cat#: E0554S):1× Q5 Reaction Buffer, 0.2 mM dNTPs, 0.5 µM each primer, 1 ng template plasmid DNA, 0.02 U/µL Q5 polymerase, Total volume: 25 µL.
- PCR cycling: 98°C for 30 s, 25 cycles: 98°C for 10 s, 60–72°C for 20 s, 72°C for 2 min/kb, 72°C for 2 min.
- Confirm mutations by Sanger sequencing.
- Transfect validated gRNA-containing plasmids into parasites following steps above.
- Follow steps above to electroporate Cas9 expressing parasites with new pU6-DHFR plasmid, and evaluate spatial phenotypes with new strain. It is recommended to generate 3 gRNAs per target.
